# Supplementary material for: Deep Learning–Assisted Diagnosis of Cerebral Aneurysms Using the HeadXNet Model
Source: PubMed Central journal article supplement (PMC6563570; doi:10.1001/jamanetworkopen.2019.5600), 2019-06-07
Supplement: jamanetwopen-2-e195600-s001.pdf [file jamanetwopen-2-e195600-s001.pdf]

## Supplementary Online Content

Park A, Chute C, Rajpurkar P, et al. Deep learning–assisted diagnosis of cerebral aneurysms using the HeadXNet Model. *JAMA Netw Open*. 2019;2(6):e195600.  
doi:10.1001/jamanetworkopen.2019.5600

**eFigure 1.** Diagram of Model Architecture

**eFigure 2.** Individual Changes in Time Spent per Case

**eTable 1.** Comparison of Individual Unaugmented and Augmented Clinicians in Aneurysm Detection on the Test Set

**eTable 2.** Mean Increase in Board-Certified Radiologists' Metrics as a Group

**eTable 3.** Comparison of Individual Unaugmented and Augmented Clinicians in Time Spent on Aneurysm Detection on the Test Set

**eTable 4.** Comparison of Confusion Matrices of Individual Unaugmented and Augmented Clinicians on Aneurysm Detection on the Test Set

This supplementary material has been provided by the authors to give readers additional information about their work.

eFigure 1. Diagram of Model Architecture.

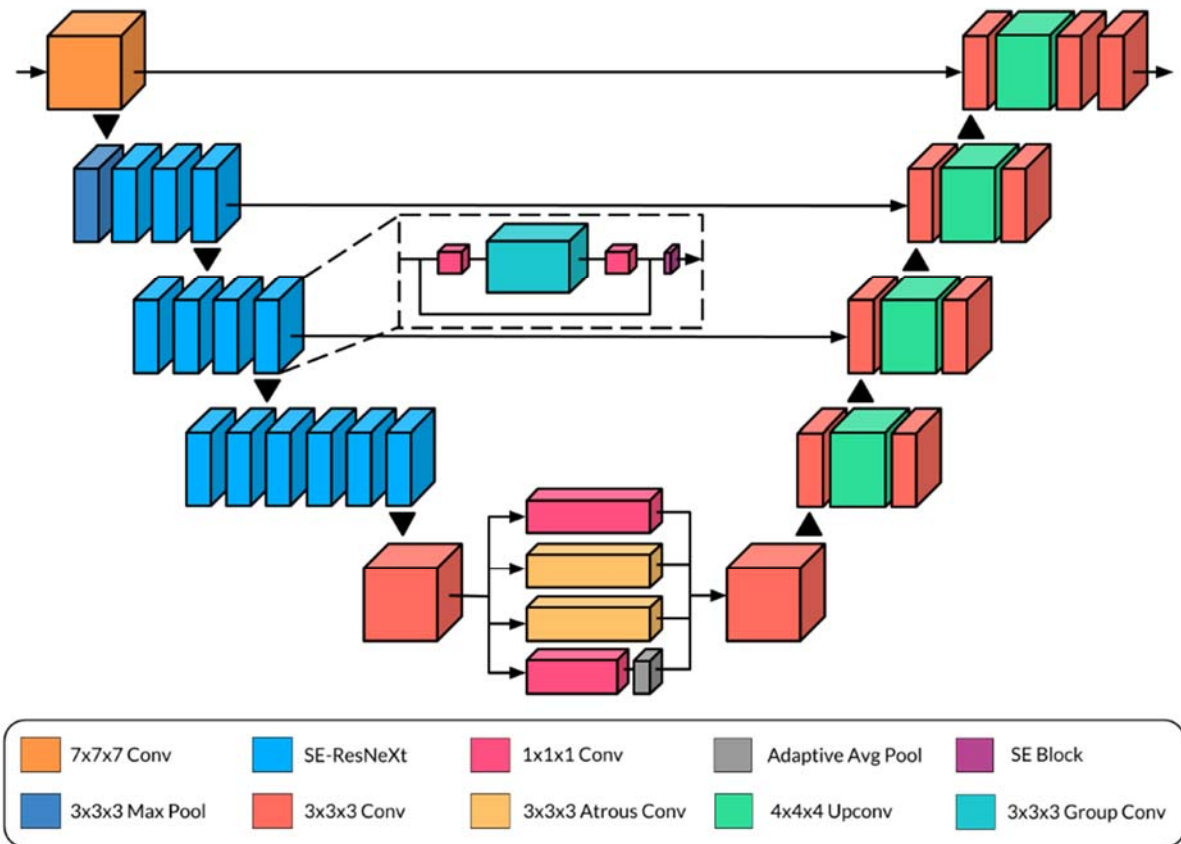

HeadXNet is a convolutional neural network (CNN) that takes in an input of a series of CTA images and outputs segmentation that consists of predicted probability of diagnosis for each voxel.

**eFigure 2. Individual Changes in Time Spent per Case.**

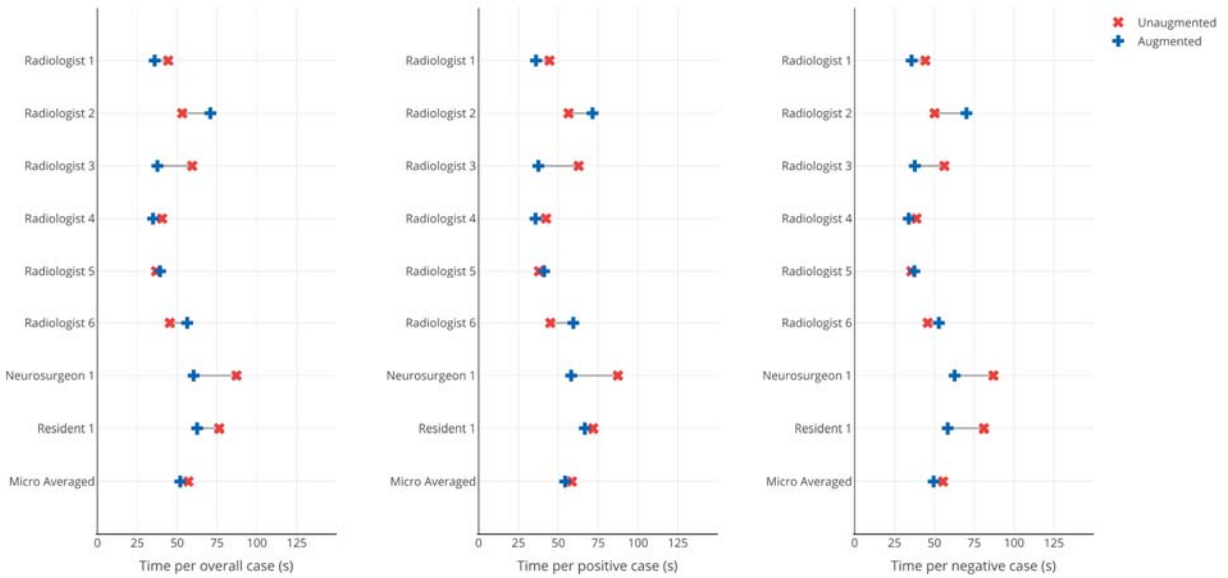

Bold grey lines depict the change in average time to diagnosis in seconds per case for each clinician with and without model augmentation. The red cross represents performance without model augmentation, and the blue plus represents performance with model augmentation.

**eTable 1. Comparison of Individual Unaugmented and Augmented Clinicians in Aneurysm Detection on the Test Set.**

| Clinician             |       | Augmentation | Sensitivity (95% CI) | Specificity (95% CI) | Accuracy (95% CI)    |
|-----------------------|-------|--------------|----------------------|----------------------|----------------------|
| <b>Radiologist 1</b>  |       | Unaugmented  | 0.847 (0.735, 0.918) | 0.982 (0.906, 0.997) | 0.913 (0.847, 0.952) |
|                       |       | Augmented    | 0.932 (0.838, 0.973) | 0.964 (0.879, 0.990) | 0.948 (0.891, 0.976) |
| <b>Radiologist 2</b>  |       | Unaugmented  | 0.847 (0.735, 0.918) | 0.964 (0.879, 0.990) | 0.904 (0.837, 0.946) |
|                       |       | Augmented    | 0.881 (0.775, 0.941) | 1.000 (0.936, 1.000) | 0.939 (0.880, 0.970) |
| <b>Radiologist 3</b>  |       | Unaugmented  | 0.814 (0.696, 0.893) | 0.911 (0.807, 0.961) | 0.861 (0.786, 0.913) |
|                       |       | Augmented    | 0.831 (0.715, 0.905) | 0.911 (0.807, 0.961) | 0.870 (0.796, 0.919) |
| <b>Radiologist 4</b>  |       | Unaugmented  | 0.729 (0.604, 0.826) | 0.929 (0.830, 0.972) | 0.826 (0.747, 0.885) |
|                       |       | Augmented    | 0.864 (0.755, 0.930) | 0.982 (0.906, 0.997) | 0.922 (0.858, 0.958) |
| <b>Radiologist 5</b>  |       | Unaugmented  | 0.915 (0.816, 0.963) | 0.982 (0.906, 0.997) | 0.948 (0.891, 0.976) |
|                       |       | Augmented    | 0.949 (0.861, 0.983) | 0.946 (0.854, 0.982) | 0.948 (0.891, 0.976) |
| <b>Radiologist 6</b>  |       | Unaugmented  | 0.831 (0.715, 0.905) | 0.964 (0.879, 0.990) | 0.896 (0.826, 0.939) |
|                       |       | Augmented    | 0.881 (0.775, 0.941) | 1.000 (0.936, 1.000) | 0.939 (0.880, 0.970) |
| <b>Neurosurgeon 1</b> |       | Unaugmented  | 0.814 (0.696, 0.893) | 0.982 (0.906, 0.997) | 0.896 (0.826, 0.939) |
|                       |       | Augmented    | 0.864 (0.755, 0.930) | 1.000 (0.936, 1.000) | 0.930 (0.869, 0.964) |
| <b>Resident 1</b>     |       | Unaugmented  | 0.847 (0.735, 0.918) | 0.964 (0.879, 0.990) | 0.904 (0.837, 0.946) |
|                       |       | Augmented    | 0.915 (0.816, 0.963) | 1.000 (0.936, 1.000) | 0.957 (0.902, 0.981) |
| <b>Micro-average</b>  |       | Unaugmented  | 0.831 (0.794, 0.862) | 0.960 (0.937, 0.974) | 0.893 (0.782, 0.912) |
|                       |       | Augmented    | 0.890 (0.858, 0.915) | 0.975 (0.957, 0.986) | 0.932 (0.913, 0.946) |
|                       | Model |              | 0.949 (0.860, 0.963) | 0.661 (0.530, 0.771) | 0.809 (0.727, 0.870) |

Sensitivity, specificity, and accuracy for each clinician, their micro-average, and the support model is shown. Confidence intervals were computed using 95% Wilson score confidence intervals to estimate the variability in each metric and are shown in parentheses.

**eTable 2. Mean Increase in Board-certified Radiologists' Metrics as a Group.**

| <b>Metric</b>      | <b>Mean Increase (95% CI)</b> | <b>P-value (unadjusted)</b> | <b>P-value (adjusted)</b> |
|--------------------|-------------------------------|-----------------------------|---------------------------|
| <b>Sensitivity</b> | 0.059 (0.013, 0.105)          | 0.011                       | 0.035                     |
| <b>Specificity</b> | 0.012 (-0.025, 0.049)         | 0.222                       | 0.222                     |
| <b>Accuracy</b>    | 0.036 (0.001, 0.072)          | 0.023                       | 0.046                     |

Controlling for multiple testing, adjusted p-values were computed using Benjamini-Hochberg correction. At the significance level of 0.05, the adjusted p-values show that the improvement in sensitivity and accuracy after model augmentation were statistically significant.

**eTable 3. Comparison of Individual Unaugmented and Augmented Clinicians in Time Spent on Aneurysm Detection on the Test Set.**

| <b>Clinician</b>      | <b>Augmentation</b> | <b>Overall cases (s)<br/>(95% CI)</b> | <b>Positive cases (s)<br/>(95% CI)</b> | <b>Negative cases (s)<br/>(95% CI)</b> |
|-----------------------|---------------------|---------------------------------------|----------------------------------------|----------------------------------------|
| <b>Radiologist 1</b>  | Unaugmented         | 44.438 (40.727, 48.149)               | 44.472 (39.489, 49.455)                | 44.404 (38.722, 50.086)                |
|                       | Augmented           | 35.857 (33.327, 38.387)               | 35.981 (32.336, 39.626)                | 35.736 (32.102, 39.369)                |
| <b>Radiologist 2</b>  | Unaugmented         | 53.143 (46.443, 59.843)               | 56.400 (46.410, 66.390)                | 50.182 (40.941, 59.423)                |
|                       | Augmented           | 70.829 (64.043, 77.615)               | 71.491 (62.184, 80.797)                | 70.154 (59.947, 80.360)                |
| <b>Radiologist 3</b>  | Unaugmented         | 59.457 (53.669, 65.245)               | 62.765 (54.110, 71.419)                | 56.333 (48.416, 64.250)                |
|                       | Augmented           | 37.629 (34.596, 40.662)               | 37.491 (33.173, 41.809)                | 37.769 (33.362, 42.177)                |
| <b>Radiologist 4</b>  | Unaugmented         | 40.524 (37.246, 43.801)               | 42.333 (37.682, 46.985)                | 38.815 (34.098, 43.532)                |
|                       | Augmented           | 34.886 (32.231, 37.541)               | 35.745 (32.640, 38.851)                | 33.940 (29.426, 38.454)                |
| <b>Radiologist 5</b>  | Unaugmented         | 36.752 (34.480, 39.025)               | 37.855 (34.550, 41.159)                | 35.540 (32.360, 38.720)                |
|                       | Augmented           | 39.257 (35.896, 42.618)               | 41.115 (36.490, 45.740)                | 37.434 (32.460, 42.408)                |
| <b>Radiologist 6</b>  | Unaugmented         | 45.390 (42.405, 48.376)               | 44.981 (40.723, 49.240)                | 45.808 (41.481, 50.134)                |
|                       | Augmented           | 56.295 (51.457, 61.133)               | 59.436 (52.791, 66.081)                | 52.840 (45.665, 60.015)                |
| <b>Neurosurgeon 1</b> | Unaugmented         | 87.219 (80.023, 94.415)               | 87.370 (77.661, 97.079)                | 87.059 (76.040, 98.077)                |
|                       | Augmented           | 60.314 (54.901, 65.728)               | 58.091 (50.977, 65.204)                | 62.760 (54.300, 71.220)                |
| <b>Resident 1</b>     | Unaugmented         | 76.371 (69.131, 83.612)               | 71.889 (63.328, 80.449)                | 81.118 (69.105, 93.130)                |
|                       | Augmented           | 62.571 (57.068, 68.074)               | 66.660 (58.406, 74.915)                | 58.404 (51.041, 65.766)                |
| <b>Micro-average</b>  | Unaugmented         | 57.040 (54.575, 59.504)               | 58.535 (55.094, 61.975)                | 55.498 (51.958, 59.037)                |
|                       | Augmented           | 51.973 (49.725, 54.220)               | 54.258 (50.929, 57.586)                | 49.574 (46.575, 52.574)                |
| <b>Model</b>          |                     | 7.581 (6.916, 8.246)                  | 7.642 (6.646, 8.637)                   | 7.519 (6.606, 8.433)                   |

Average time to diagnosis in seconds per case for overall cases, positive cases, and negative cases is shown for each clinician. Confidence intervals were computed using *t*-score confidence intervals to estimate the variability in each metric and are shown in brackets.

**eTable 4. Comparison of Confusion Matrices of Individual Unaugmented and Augmented Clinicians on Aneurysm Detection on the Test Set.**

| <b>Clinician</b>      | <b>Augmentation</b> | <b>True Positives</b> | <b>False Positives</b> | <b>True Negatives</b> | <b>False Negatives</b> |
|-----------------------|---------------------|-----------------------|------------------------|-----------------------|------------------------|
| <b>Radiologist 1</b>  | Unaugmented         | 55                    | 1                      | 9                     | 50                     |
|                       | Augmented           | 54                    | 2                      | 4                     | 55                     |
| <b>Radiologist 2</b>  | Unaugmented         | 54                    | 2                      | 9                     | 50                     |
|                       | Augmented           | 56                    | 0                      | 7                     | 52                     |
| <b>Radiologist 3</b>  | Unaugmented         | 51                    | 5                      | 11                    | 48                     |
|                       | Augmented           | 51                    | 5                      | 10                    | 49                     |
| <b>Radiologist 4</b>  | Unaugmented         | 52                    | 4                      | 16                    | 43                     |
|                       | Augmented           | 55                    | 1                      | 8                     | 51                     |
| <b>Radiologist 5</b>  | Unaugmented         | 55                    | 1                      | 5                     | 54                     |
|                       | Augmented           | 53                    | 3                      | 3                     | 56                     |
| <b>Radiologist 6</b>  | Unaugmented         | 54                    | 2                      | 10                    | 49                     |
|                       | Augmented           | 56                    | 0                      | 7                     | 52                     |
| <b>Neurosurgeon 1</b> | Unaugmented         | 55                    | 1                      | 11                    | 48                     |
|                       | Augmented           | 56                    | 0                      | 8                     | 51                     |
| <b>Resident 1</b>     | Unaugmented         | 54                    | 2                      | 9                     | 50                     |
|                       | Augmented           | 56                    | 0                      | 5                     | 54                     |
| <b>Micro-average</b>  | Unaugmented         | 430                   | 18                     | 80                    | 392                    |
|                       | Augmented           | 437                   | 11                     | 52                    | 420                    |
| <b>Model</b>          |                     | 37                    | 19                     | 3                     | 56                     |

Number of true positive, false positive, true negative, and false negative diagnoses out of the 115 test cases for each clinician and the model is shown.
